# Supplementary material
Source: PubMed Central journal article supplement (PMC6460747)
Supplement: 41437_2018_105_MOESM1_ESM.pdf [file 41437_2018_105_MOESM1_ESM.pdf]

# ACCURATE GENOMIC PREDICTION OF *Coffea canephora* IN MULTIPLE ENVIRONMENTS USING WHOLE-GENOME STATISTICAL MODELS

## SUPPLEMENTARY MATERIAL

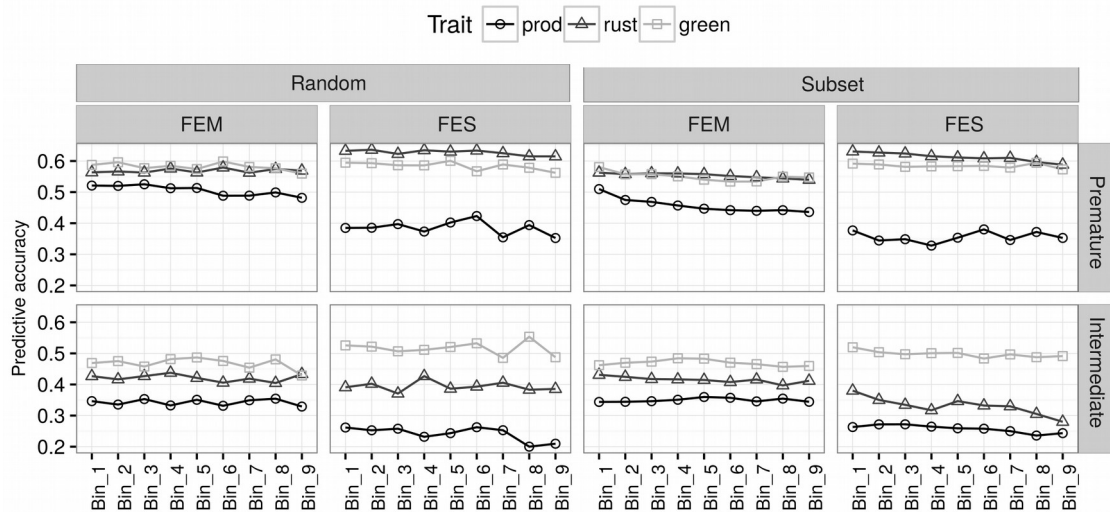

**Figure S1:** Mean predictive ability using different marker densities. Two *Coffea canephora* populations (Intermediate and Premature) evaluated at two locations (FEM and FES) for production (kilograms of mature coffee fruit in the cherries stage), incidence of coffee leaf rust (scaling score) and yield of green beans (grams in samples of 2 kilograms of coffee fruit in the cherries stage). Right column: SNPs were sampled across the genome. Left column: SNPs were selected based on MAF and call rate. From Bin1 to Bin9, in the Intermediate population, the number of SNPs are: 35427, 20450, 13690, 10189, 7989, 6577, 5559, 4780 and 4240. For the Premature population, the number of SNPs are: 40767, 21433, 13969, 10283, 8019, 6587, 5560, 4780 and 4240.

**Table S1:** Variance and covariance (VCOV) structures examined for the random effects in Model 1 for *Coffea canephora* phenotypic analysis

| <b>Model</b> | <b>Num. Parameters<sup>a</sup></b> | <b>Description</b>                            |
|--------------|------------------------------------|-----------------------------------------------|
| Ident        | 1                                  | Identical variation                           |
| Diag         | $K$                                | Heterogeneous variations                      |
| CompSym      | $K+1$                              | Compound symmetry with heterogeneous variance |
| Uns          | $K(K+1)/2$                         | Unstructured model                            |

<sup>a</sup> The number of parameters for the models follows from the sum of the parameters for the component matrices minus the number of identification constraints.  $K$  is the number of harvests.

**Table S2:** Analysis of variance (ANOVA) *p*-values and other statistics for candidate factors affecting the accuracy of genomic predictions in *Coffea canephora*. Candidate factors include the choice of genomic selection model, trait, population and location, and pairwise combinations of these factors.

| <b>Source of variation</b> | <b>df</b> | <b>Sum Sq</b> | <b>Mean Sq</b> | <b>F value</b> | <b><i>p</i>-value</b> |
|----------------------------|-----------|---------------|----------------|----------------|-----------------------|
| Model <sup>a</sup>         | 11        | 1.73          | 0.16           | 4.06           | <0.0001               |
| Trait <sup>b</sup>         | 2         | 30.63         | 15.31          | 395.51         | <0.0001               |
| Pop <sup>c</sup>           | 1         | 42.24         | 42.24          | 1090.85        | <0.0001               |
| Loc <sup>d</sup>           | 1         | 0.34          | 0.34           | 8.73           | 0.0031                |
| Model x Pop                | 11        | 0.57          | 0.05           | 1.33           | 0.2021                |
| Model x Trait              | 22        | 0.54          | 0.02           | 0.63           | 0.9031                |
| Model x Loc                | 11        | 0.13          | 0.01           | 0.31           | 0.9840                |
| Trait x Pop                | 2         | 2.72          | 1.36           | 35.09          | <0.0001               |
| Trait x Loc                | 2         | 8.20          | 4.10           | 105.86         | <0.0001               |
| Pop x Loc                  | 1         | 0.10          | 0.10           | 2.61           | 0.1064                |
| Residuals                  | 4255      | 164.75        | 0.04           |                |                       |

<sup>a</sup> Categorical variable for choice of genomic selection method (bayesA, bayesB, bayesC, bayesLASSO, bayesRR, bayesR, bayesVS, bsmlm, rblup, lasso, pls, and RForest). The fixedMLR model was not considered in the analysis. (Tukey's *post hoc* test classified all methods in the same group except the LASSO.)

<sup>b</sup> Trait in three for trait (production, incidence of coffee leaf rust, and yield of green beans).

<sup>c</sup> Pop in two recurrent selection populations (Intermediate and Premature).

<sup>d</sup> Loc in two locations (FEM and FES).

**Table S3:** Goodness-of-fit values for the genetic and residual matrices, factored by harvest. Two *Coffea canephora* populations (Intermediate and Premature) were evaluated in two locations (FEM and FES) for production (kilograms of mature coffee fruit in the cherries stage), incidence of coffee leaf rust (scaling score) and yield of green beans (grams in samples of 2 kilograms of coffee fruit in the cherries stage).

| Intermediate |                |                |                |                |               |               |                |                |
|--------------|----------------|----------------|----------------|----------------|---------------|---------------|----------------|----------------|
| Location     | G <sub>h</sub> | R <sub>h</sub> | Production     |                | Rust          |               | Green          |                |
|              |                |                | AIC            | BIC            | AIC           | BIC           | AIC            | BIC            |
| FEM          | Ident          | Ident          | 9709.4         | 9751.4         | 9709.4        | 9751.4        | 10816.0        | 10849.7        |
|              | Diag           | Ident          | 9679.8         | 9737.5         | 9679.8        | 9737.5        | 10746.8        | 10795.0        |
|              | CompSym        | Ident          | 9695.6         | 9742.7         | 9695.6        | 9742.7        | 10805.6        | 10844.1        |
|              | Uns            | Ident          | 9639.7         | 9728.8         | 9639.7        | 9728.8        | 10750.6        | 10827.7        |
|              | Ident          | Diag           | 9648.9         | 9706.6         | 9648.9        | 9706.6        | 10511.5        | 10559.7        |
|              | Diag           | Diag           | 9627.0         | 9700.4         | 9627.0        | 9700.4        | 10516.1        | 10578.7        |
|              | CompSym        | Diag           | 9632.6         | 9695.5         | 9632.6        | 9695.5        | <b>10484.3</b> | <b>10537.2</b> |
|              | Uns            | Diag           | <b>9587.0</b>  | <b>9691.9</b>  | <b>9587.0</b> | <b>9691.9</b> | 10492.8        | 10584.2        |
| FES          | Ident          | Ident          | 10296.6        | 10338.5        | 5218.2        | 5260.2        | 9661.9         | 9695.7         |
|              | Diag           | Ident          | 10281.3        | 10339.0        | 5220.7        | 5278.5        | 9646.1         | 9694.4         |
|              | CompSym        | Ident          | 10224.0        | 10271.2        | 5094.0        | 5141.3        | 9570.2         | 9608.8         |
|              | Uns            | Ident          | 10141.2        | 10230.4        | 5077.4        | 5166.6        | 9536.6         | 9613.8         |
|              | Ident          | Diag           | 10275.7        | 10333.5        | 5190.8        | 5248.5        | 9595.7         | 9643.9         |
|              | Diag           | Diag           | 10256.3        | 10329.7        | 5192.3        | 5265.8        | 9595.9         | 9658.6         |
|              | CompSym        | Diag           | 10203.6        | 10266.5        | 5064.0        | <b>5127.1</b> | 9498.2         | <b>9551.3</b>  |
|              | Uns            | Diag           | <b>10114.3</b> | <b>10219.3</b> | <b>5048.4</b> | 5153.4        | <b>9483.9</b>  | 9575.6         |
| Premature    |                |                |                |                |               |               |                |                |
| FEM          | Ident          | Ident          | 8279.9         | 8320.7         | 3318.7        | 3359.6        | 9470.3         | 9503.1         |
|              | Diag           | Ident          | 8284.3         | 8340.5         | 3195.2        | 3251.5        | 9413.4         | 9460.2         |
|              | CompSym        | Ident          | 8257.3         | 8303.3         | 3319.2        | 3365.2        | 9447.9         | 9485.4         |
|              | Uns            | Ident          | 8259.6         | 8346.5         | 3185.6        | 3272.6        | 9389.3         | 9464.3         |
|              | Ident          | Diag           | 8239.4         | 8295.6         | 3236.0        | 3292.3        | 9312.6         | 9359.5         |
|              | Diag           | Diag           | 8243.8         | 8315.3         | 3134.5        | <b>3206.1</b> | 9309.2         | 9370.2         |
|              | CompSym        | Diag           | <b>8215.5</b>  | <b>8276.8</b>  | 3236.2        | 3297.6        | <b>9267.4</b>  | <b>9318.9</b>  |
|              | Uns            | Diag           | 8219.0         | 8321.2         | <b>3124.0</b> | 3226.3        | 9268.1         | 9357.1         |
| FES          | Ident          | Ident          | 8661.8         | 8702.5         | 4509.7        | 4550.3        | 8338.5         | 8371.0         |
|              | Diag           | Ident          | 8641.0         | 8696.9         | 4484.0        | 4539.9        | 8297.5         | 8344.0         |
|              | CompSym        | Ident          | 8586.9         | 8632.6         | 4360.4        | 4406.1        | 8186.1         | 8223.2         |
|              | Uns            | Ident          | 8525.2         | <b>8611.5</b>  | 4305.1        | 4391.4        | 8110.6         | <b>8185.0</b>  |
|              | Ident          | Diag           | 8644.8         | 8700.7         | 4437.3        | 4493.1        | 8324.4         | 8370.9         |
|              | Diag           | Diag           | 8629.0         | 8700.1         | 4414.8        | 4485.9        | 8291.3         | 8351.7         |
|              | CompSym        | Diag           | 8569.6         | 8630.5         | 4286.3        | 4347.3        | 8154.3         | 8205.4         |
|              | Uns            | Diag           | <b>8513.2</b>  | 8614.8         | <b>4233.4</b> | <b>4334.9</b> | <b>8103.0</b>  | 8191.4         |

Ident: Identical variation; Diag: Heterogeneous variations; CompSym: compound symmetry with heterogeneous variance; Uns: unstructured model. Bold numbers represent the smallest AIC and BIC values, indicating the best fitted phenotypic model.

**Table S4:** Mean predictive ability of thirteen methods applied to genomic prediction. Two *Coffea canephora* populations (Intermediate and Premature) evaluated in two locations (FEM and FES) for production (kilograms of mature coffee fruit in the cherries stage), incidence of coffee leaf rust (scaling score) and yield of green beans (grams in samples of 2 kilograms of coffee fruit in the cherries stage). Predictive abilities were assessed using a Replicated Training-Testing evaluation. In each replication, 80% of the individuals were assigned randomly for training data set, while the remaining 20% were assigned for testing data set (TST).

| Model      | Intermediate |        |        |            |        |        |
|------------|--------------|--------|--------|------------|--------|--------|
|            | FEM          |        |        | FES        |        |        |
|            | Production   | Rust   | Green  | Production | Rust   | Green  |
| bayesA     | 0.3591       | 0.4241 | 0.4634 | 0.2686     | 0.3938 | 0.5252 |
| bayesB     | 0.3539       | 0.4299 | 0.4656 | 0.2687     | 0.3936 | 0.5250 |
| bayesC     | 0.3531       | 0.4332 | 0.4685 | 0.2673     | 0.3936 | 0.5290 |
| bayesLASSO | 0.3509       | 0.4350 | 0.4663 | 0.2623     | 0.3903 | 0.5280 |
| bayesRR    | 0.3568       | 0.4325 | 0.4674 | 0.2655     | 0.3962 | 0.5283 |
| bayesR     | 0.3465       | 0.4244 | 0.4119 | 0.2493     | 0.3856 | 0.5356 |
| bayesVS    | 0.3470       | 0.4029 | 0.4493 | 0.2165     | 0.3499 | 0.4151 |
| bslmm      | 0.3442       | 0.4195 | 0.4594 | 0.2451     | 0.3600 | 0.5046 |
| rrblup     | 0.3442       | 0.4280 | 0.4653 | 0.2562     | 0.3911 | 0.5222 |
| lasso      | 0.3013       | 0.4308 | 0.4160 | 0.2937     | 0.2445 | 0.4454 |
| pls        | 0.3701       | 0.4047 | 0.4522 | 0.2891     | 0.3926 | 0.5151 |
| RForest    | 0.3844       | 0.3970 | 0.4073 | 0.1763     | 0.3399 | 0.5104 |
| fixedMLR   | 0.1219       | 0.0298 | -0.019 | 0.0056     | -0.017 | -0.018 |
|            | Premature    |        |        |            |        |        |
| bayesA     | 0.5253       | 0.5637 | 0.5792 | 0.3796     | 0.6348 | 0.5980 |
| bayesB     | 0.5248       | 0.5661 | 0.5807 | 0.3787     | 0.6341 | 0.5980 |
| bayesC     | 0.5245       | 0.5663 | 0.5802 | 0.3793     | 0.6357 | 0.6003 |
| bayesLASSO | 0.5229       | 0.5706 | 0.5779 | 0.3723     | 0.6383 | 0.6012 |
| bayesRR    | 0.5252       | 0.5687 | 0.5804 | 0.3792     | 0.6352 | 0.5993 |
| bayesR     | 0.5371       | 0.5777 | 0.5895 | 0.4050     | 0.5980 | 0.5863 |
| bayesVS    | 0.5067       | 0.5625 | 0.5754 | 0.3973     | 0.6371 | 0.5264 |
| bslmm      | 0.5037       | 0.5515 | 0.5564 | 0.4251     | 0.6287 | 0.57   |
| rrblup     | 0.5181       | 0.5649 | 0.5872 | 0.3822     | 0.6313 | 0.5923 |
| lasso      | 0.4693       | 0.4953 | 0.4679 | 0.3679     | 0.5831 | 0.5717 |
| pls        | 0.5184       | 0.5496 | 0.5870 | 0.3867     | 0.6305 | 0.5908 |
| RForest    | 0.5537       | 0.5770 | 0.5646 | 0.4309     | 0.6907 | 0.5849 |
| fixedMLR   | 0.0050       | 0.0025 | 0.0428 | 0.0321     | 0.0861 | 0.0193 |

**Table S5:** Mean value of the mean squared prediction error (MSPE) of thirteen methods applied to genomic prediction. Two *Coffea canephora* populations (Intermediate and Premature) evaluated in two locations (FEM and FES) for production (kilograms of mature coffee fruit in the cherries stage), incidence of coffee leaf rust (scaling score) and yield of green beans (grams in samples of 2 kilograms of coffee fruit in the cherries stage). Predictive abilities were assessed using a Replicated Training-Testing evaluation. In each replication, 80% of the individuals were assigned randomly for training data set, while the remaining 20% were assigned for testing data set (TST).

| <b>Intermediate</b> |                   |                 |                 |                   |                 |                 |
|---------------------|-------------------|-----------------|-----------------|-------------------|-----------------|-----------------|
|                     | <b>FEM</b>        |                 |                 | <b>FES</b>        |                 |                 |
| <b>Model</b>        | <b>Production</b> | <b>Rust</b>     | <b>Green</b>    | <b>Production</b> | <b>Rust</b>     | <b>Green</b>    |
| <b>bayesA</b>       | 0.87              | 0.90            | 0.76            | 0.88              | 0.82            | 0.71            |
| <b>bayesB</b>       | 0.87              | 0.89            | 0.75            | 0.87              | 0.83            | 0.72            |
| <b>bayesC</b>       | 0.87              | 0.89            | 0.75            | 0.87              | 0.83            | 0.71            |
| <b>bayesLASSO</b>   | 0.88              | 0.90            | 0.76            | 0.87              | 0.84            | 0.72            |
| <b>bayesRR</b>      | 0.87              | 0.89            | 0.75            | 0.87              | 0.83            | 0.71            |
| <b>bayesR</b>       | 0.89              | 0.92            | 0.82            | 0.89              | 0.83            | 0.73            |
| <b>bayesVS</b>      | 0.93              | 0.96            | 0.85            | 0.92              | 0.92            | 0.87            |
| <b>bslmm</b>        | 0.88              | 0.91            | 0.76            | 0.91              | 0.86            | 0.71            |
| <b>rrblup</b>       | 1.04              | 2.03            | 1.88            | 0.91              | 1.37            | 1.09            |
| <b>lasso</b>        | 0.95              | 0.88            | 0.84            | 0.85              | 1.00            | 0.77            |
| <b>pls</b>          | 3.09              | 3.76            | 2.88            | 1.01              | 1.28            | 1.05            |
| <b>RForest</b>      | 0.85              | 0.93            | 0.82            | 0.91              | 0.87            | 0.78            |
| <b>fixedMLR</b>     | 762.47            | 108.66          | 50.57           | 10 <sup>4</sup>   | 10 <sup>4</sup> | 10 <sup>3</sup> |
| <b>Premature</b>    |                   |                 |                 |                   |                 |                 |
| <b>bayesA</b>       | 0.75              | 0.67            | 0.66            | 0.87              | 0.59            | 0.65            |
| <b>bayesB</b>       | 0.75              | 0.67            | 0.66            | 0.88              | 0.59            | 0.65            |
| <b>bayesC</b>       | 0.75              | 0.66            | 0.66            | 0.88              | 0.59            | 0.65            |
| <b>bayesLASSO</b>   | 0.76              | 0.66            | 0.67            | 0.89              | 0.59            | 0.67            |
| <b>bayesRR</b>      | 0.75              | 0.66            | 0.66            | 0.88              | 0.59            | 0.66            |
| <b>bayesR</b>       | 0.76              | 0.68            | 0.70            | 0.88              | 0.69            | 0.69            |
| <b>bayesVS</b>      | 0.82              | 0.71            | 0.74            | 0.93              | 0.63            | 0.79            |
| <b>bslmm</b>        | 0.77              | 0.68            | 0.68            | 0.85              | 0.60            | 0.68            |
| <b>rrblup</b>       | 0.77              | 1.59            | 0.93            | 1.50              | 1.95            | 1.52            |
| <b>lasso</b>        | 0.80              | 0.75            | 0.76            | 0.93              | 0.68            | 0.83            |
| <b>pls</b>          | 0.76              | 1.68            | 0.93            | 1.64              | 1.98            | 1.56            |
| <b>RForest</b>      | 0.74              | 0.67            | 0.71            | 0.85              | 0.54            | 0.68            |
| <b>fixedMLR</b>     | 10 <sup>4</sup>   | 10 <sup>4</sup> | 10 <sup>4</sup> | 10 <sup>4</sup>   | 2794.73         | 10 <sup>4</sup> |

**Table S6:** Mean value of the linear regression coefficient of the observed on predicted genetic value (slope) of thirteen methods applied to genomic prediction. Two *Coffea canephora* populations (Intermediate and Premature) evaluated in two locations (FEM and FES) for production (kilograms of mature coffee fruit in the cherries stage), incidence of coffee leaf rust (scaling score) and yield of green beans (grams in samples of 2 kilograms of coffee fruit in the cherries stage). Predictive abilities were assessed using a Replicated Training-Testing evaluation. In each replication, 80% of the individuals were assigned randomly for training data set, while the remaining 20% were assigned for testing data set (TST).

| <b>Intermediate</b> |                   |             |              |                   |             |              |
|---------------------|-------------------|-------------|--------------|-------------------|-------------|--------------|
|                     | <b>FEM</b>        |             |              | <b>FES</b>        |             |              |
| <b>Model</b>        | <b>Production</b> | <b>Rust</b> | <b>Green</b> | <b>Production</b> | <b>Rust</b> | <b>Green</b> |
| <b>bayesA</b>       | 1.003             | 1.002       | 1.016        | 0.740             | 1.056       | 1.183        |
| <b>bayesB</b>       | 1.044             | 1.054       | 1.070        | 0.809             | 1.121       | 1.214        |
| <b>bayesC</b>       | 1.114             | 1.102       | 1.114        | 0.865             | 1.171       | 1.248        |
| <b>bayesLASSO</b>   | 1.197             | 1.240       | 1.230        | 0.903             | 1.275       | 1.396        |
| <b>bayesRR</b>      | 1.118             | 1.118       | 1.127        | 0.857             | 1.220       | 1.253        |
| <b>bayesR</b>       | 1.658             | 1.497       | 1.425        | 1.409             | 1.426       | 1.542        |
| <b>bayesVS</b>      | 3.514             | 2.132       | 2.918        | 3.302             | 2.697       | 1.869        |
| <b>bslmm</b>        | 1.212             | 1.081       | 1.050        | 0.906             | 1.026       | 1.045        |
| <b>rrblup</b>       | 1.370             | 1.370       | 1.370        | 1.239             | 1.239       | 1.239        |
| <b>lasso</b>        | 0.758             | 1.091       | 1.021        | 0.724             | 0.667       | 1.029        |
| <b>pls</b>          | 0.779             | 0.780       | 0.801        | 0.613             | 0.835       | 0.963        |
| <b>RForest</b>      | 1.334             | 1.397       | 1.525        | 0.719             | 1.264       | 1.859        |
| <b>fixedMLR</b>     | 0.070             | 0.027       | -0.02        | 0.002             | 0.006       | -0.01        |
| <b>Premature</b>    |                   |             |              |                   |             |              |
| <b>bayesA</b>       | 1.170             | 0.987       | 0.851        | 1.093             | 1.033       | 1.168        |
| <b>bayesB</b>       | 1.189             | 1.014       | 0.911        | 1.119             | 1.048       | 1.183        |
| <b>bayesC</b>       | 1.210             | 1.039       | 0.938        | 1.154             | 1.071       | 1.215        |
| <b>bayesLASSO</b>   | 1.366             | 1.143       | 1.202        | 1.316             | 1.168       | 1.364        |
| <b>bayesRR</b>      | 1.217             | 1.044       | 0.954        | 1.173             | 1.070       | 1.221        |
| <b>bayesR</b>       | 1.584             | 1.456       | 1.881        | 1.813             | 1.315       | 1.423        |
| <b>bayesVS</b>      | 2.027             | 1.495       | 2.375        | 2.510             | 1.454       | 1.580        |
| <b>bslmm</b>        | 1.014             | 0.979       | 1.024        | 1.166             | 0.990       | 1.027        |
| <b>rrblup</b>       | 1.042             | 1.007       | 0.847        | 1.093             | 0.993       | 1.079        |
| <b>lasso</b>        | 1.095             | 0.979       | 0.455        | 0.916             | 1.038       | 1.135        |
| <b>pls</b>          | 1.026             | 0.865       | 0.694        | 0.941             | 0.930       | 1.022        |
| <b>RForest</b>      | 1.493             | 1.211       | 1.186        | 1.376             | 1.264       | 1.306        |
| <b>fixedMLR</b>     | -0.002            | -0.002      | 0            | 0                 | 0.014       | 0.001        |
